# Supplementary material for: Distribution, seasonality, optical characteristics, and fluxes of dissolved organic matter (DOM) in the Pearl River (Zhujiang) estuary, China
Source: Copernicus journal article supplement (doi:10.5194/bg-2018-403), 2018-10-08
Supplement: Supplementary file 1 [file bg-2018-403-supplement.pdf]

## Supplementary material

**Table S1.** Absorption coefficients of CDOM at typical wavelengths and the spectral slope coefficient between 300 nm and 500 nm. S and B denote surface and bottom, respectively.

| Station     | Absorption coefficients ( $\text{m}^{-1}$ ) |           |           |           |           |           |           | $S_{300-500}$<br>( $\text{nm}^{-1}$ ) |
|-------------|---------------------------------------------|-----------|-----------|-----------|-----------|-----------|-----------|---------------------------------------|
|             | $a_{254}$                                   | $a_{325}$ | $a_{330}$ | $a_{350}$ | $a_{355}$ | $a_{412}$ | $a_{450}$ |                                       |
| August 2015 |                                             |           |           |           |           |           |           |                                       |
| M01-S       | 12.86                                       | 4.70      | 4.35      | 3.18      | 2.95      | 1.09      | 0.63      | 0.0162                                |
| M01-B       | 12.32                                       | 4.60      | 4.27      | 3.21      | 3.00      | 1.16      | 0.72      | 0.0153                                |
| M02-S       | 10.04                                       | 3.40      | 3.09      | 2.19      | 2.03      | 0.70      | 0.38      | 0.0179                                |
| M02-B       | 9.39                                        | 3.23      | 2.96      | 2.12      | 1.95      | 0.69      | 0.38      | 0.0176                                |
| M03-S       | 8.60                                        | 2.83      | 2.56      | 1.80      | 1.64      | 0.55      | 0.29      | 0.0187                                |
| M03-B       | 5.35                                        | 1.81      | 1.65      | 1.18      | 1.10      | 0.38      | 0.19      | 0.0174                                |
| M04-S       | 9.17                                        | 3.02      | 2.74      | 1.89      | 1.73      | 0.58      | 0.31      | 0.0189                                |
| M04-B       | 8.71                                        | 2.89      | 2.61      | 1.82      | 1.67      | 0.57      | 0.31      | 0.0187                                |
| M05-S       | 6.04                                        | 1.95      | 1.78      | 1.22      | 1.11      | 0.36      | 0.18      | 0.0193                                |
| M05-B       | 6.60                                        | 2.18      | 1.99      | 1.38      | 1.27      | 0.41      | 0.22      | 0.0188                                |
| M06-S       | 5.78                                        | 1.82      | 1.66      | 1.16      | 1.05      | 0.34      | 0.17      | 0.0192                                |
| M06-B       | 4.07                                        | 1.29      | 1.19      | 0.84      | 0.77      | 0.27      | 0.14      | 0.0181                                |
| M07-S       | 6.81                                        | 2.10      | 1.91      | 1.33      | 1.22      | 0.42      | 0.21      | 0.0189                                |
| M07-B       | 4.17                                        | 1.26      | 1.15      | 0.81      | 0.74      | 0.26      | 0.13      | 0.0185                                |
| M08-S       | 5.86                                        | 1.80      | 1.63      | 1.13      | 1.03      | 0.36      | 0.19      | 0.0191                                |
| M08-B       | 5.12                                        | 1.58      | 1.44      | 1.00      | 0.91      | 0.32      | 0.17      | 0.0188                                |
| M09-S       | 4.52                                        | 1.45      | 1.33      | 0.96      | 0.89      | 0.38      | 0.23      | 0.0161                                |
| M09-B       | 3.18                                        | 0.92      | 0.85      | 0.59      | 0.53      | 0.20      | 0.10      | 0.0181                                |
| M10-S       | 4.41                                        | 1.25      | 1.12      | 0.76      | 0.69      | 0.24      | 0.12      | 0.0200                                |
| M10-B       | 2.29                                        | 0.61      | 0.56      | 0.38      | 0.34      | 0.14      | 0.06      | 0.0188                                |
| W01-S       | 5.36                                        | 1.70      | 1.56      | 1.08      | 0.98      | 0.34      | 0.17      | 0.0191                                |
| W01-B       | 5.93                                        | 1.91      | 1.73      | 1.20      | 1.10      | 0.37      | 0.19      | 0.0191                                |
| W02-S       | 6.22                                        | 1.93      | 1.76      | 1.21      | 1.11      | 0.37      | 0.19      | 0.0192                                |
| W02-B       | 4.67                                        | 1.47      | 1.34      | 0.93      | 0.85      | 0.28      | 0.15      | 0.0190                                |
| W03-S       | 4.89                                        | 1.50      | 1.35      | 0.95      | 0.86      | 0.31      | 0.16      | 0.0186                                |
| W03-B       | 4.29                                        | 1.29      | 1.17      | 0.82      | 0.74      | 0.25      | 0.12      | 0.0192                                |
| W04-S       | 4.02                                        | 1.17      | 1.07      | 0.73      | 0.66      | 0.23      | 0.11      | 0.0200                                |
| W04-B       | 3.88                                        | 1.15      | 1.04      | 0.71      | 0.64      | 0.23      | 0.11      | 0.0196                                |
| E01-S       | 6.16                                        | 2.19      | 2.02      | 1.50      | 1.39      | 0.60      | 0.43      | 0.0152                                |
| E01-B       | 7.12                                        | 2.29      | 2.09      | 1.48      | 1.34      | 0.45      | 0.23      | 0.0187                                |
| E02-S       | 5.15                                        | 1.60      | 1.45      | 1.02      | 0.93      | 0.33      | 0.17      | 0.0186                                |
| E02-B       | 4.47                                        | 1.36      | 1.24      | 0.86      | 0.79      | 0.27      | 0.14      | 0.0189                                |
| E03-S       | 6.01                                        | 2.20      | 2.04      | 1.59      | 1.49      | 0.87      | 0.69      | 0.0120                                |
| E03-B       | 2.50                                        | 0.70      | 0.63      | 0.45      | 0.41      | 0.16      | 0.08      | 0.0178                                |

|       |      |      |      |      |      |      |      |        |
|-------|------|------|------|------|------|------|------|--------|
| E04-S | 3.98 | 1.18 | 1.08 | 0.74 | 0.66 | 0.24 | 0.12 | 0.0191 |
| E04-B | 3.23 | 1.02 | 0.94 | 0.69 | 0.64 | 0.29 | 0.18 | 0.0153 |

November 2015

|       |       |      |      |      |      |      |       |        |
|-------|-------|------|------|------|------|------|-------|--------|
| M01-S | 8.00  | 2.93 | 2.68 | 1.96 | 1.82 | 0.73 | 0.43  | 0.0159 |
| M01-B | NA    | NA   | NA   | NA   | NA   | NA   | NA    | NA     |
| M02-S | 10.08 | 3.65 | 3.35 | 2.45 | 2.28 | 0.87 | 0.51  | 0.0164 |
| M02-B | 10.61 | 3.72 | 3.40 | 2.45 | 2.25 | 0.81 | 0.45  | 0.0174 |
| M03-S | 8.01  | 2.76 | 2.51 | 1.77 | 1.63 | 0.59 | 0.34  | 0.0179 |
| M03-B | 7.44  | 2.54 | 2.30 | 1.62 | 1.50 | 0.55 | 0.32  | 0.0178 |
| M04-S | 5.70  | 1.86 | 1.67 | 1.17 | 1.08 | 0.37 | 0.20  | 0.0187 |
| M04-B | 5.21  | 1.68 | 1.52 | 1.06 | 0.98 | 0.34 | 0.19  | 0.0188 |
| M05-S | 6.24  | 2.06 | 1.86 | 1.31 | 1.19 | 0.37 | 0.16  | 0.0195 |
| M05-B | 6.27  | 2.15 | 1.93 | 1.38 | 1.26 | 0.44 | 0.24  | 0.0179 |
| M06-S | 4.48  | 1.54 | 1.40 | 1.00 | 0.93 | 0.33 | 0.18  | 0.0177 |
| M06-B | 4.37  | 1.34 | 1.20 | 0.87 | 0.79 | 0.24 | 0.12  | 0.0192 |
| M07-S | 4.25  | 1.29 | 1.17 | 0.85 | 0.77 | 0.26 | 0.13  | 0.0187 |
| M07-B | 4.23  | 1.26 | 1.13 | 0.83 | 0.77 | 0.26 | 0.14  | 0.0180 |
| M08-S | 4.24  | 1.40 | 1.26 | 0.90 | 0.82 | 0.30 | 0.16  | 0.0180 |
| M08-B | 3.63  | 1.14 | 1.03 | 0.76 | 0.69 | 0.25 | 0.14  | 0.0176 |
| M09-S | 3.86  | 1.21 | 1.09 | 0.78 | 0.72 | 0.24 | 0.12  | 0.0188 |
| M09-B | 3.12  | 0.93 | 0.83 | 0.60 | 0.56 | 0.18 | 0.09  | 0.0186 |
| M10-S | 2.59  | 0.60 | 0.54 | 0.37 | 0.34 | 0.08 | 0.004 | 0.0233 |
| M10-B | 1.90  | 0.47 | 0.43 | 0.31 | 0.30 | 0.11 | 0.06  | 0.0165 |
| W01-S | 4.07  | 1.32 | 1.18 | 0.84 | 0.77 | 0.26 | 0.14  | 0.0187 |
| W01-B | 3.58  | 1.15 | 1.04 | 0.74 | 0.67 | 0.23 | 0.12  | 0.0188 |
| W02-S | 3.97  | 1.26 | 1.13 | 0.81 | 0.74 | 0.26 | 0.14  | 0.0186 |
| W02-B | 4.17  | 1.33 | 1.22 | 0.88 | 0.80 | 0.29 | 0.16  | 0.0178 |
| W03-S | 4.52  | 1.39 | 1.26 | 0.90 | 0.82 | 0.28 | 0.15  | 0.0188 |
| W03-B | 4.11  | 1.26 | 1.13 | 0.82 | 0.74 | 0.25 | 0.13  | 0.0189 |
| W04-S | 3.56  | 1.03 | 0.92 | 0.67 | 0.61 | 0.20 | 0.10  | 0.0191 |
| W04-B | 3.59  | 1.03 | 0.93 | 0.66 | 0.61 | 0.20 | 0.09  | 0.0190 |
| E01-S | 5.65  | 1.83 | 1.65 | 1.16 | 1.05 | 0.35 | 0.18  | 0.0192 |
| E01-B | 5.30  | 1.70 | 1.53 | 1.09 | 1.00 | 0.32 | 0.17  | 0.0190 |
| E02-S | 4.58  | 1.37 | 1.24 | 0.89 | 0.80 | 0.28 | 0.15  | 0.0188 |
| E02-B | 3.33  | 0.97 | 0.87 | 0.64 | 0.58 | 0.18 | 0.08  | 0.0192 |
| E03-S | 3.44  | 1.09 | 0.99 | 0.72 | 0.67 | 0.21 | 0.10  | 0.0185 |
| E03-B | 2.50  | 0.68 | 0.63 | 0.46 | 0.42 | 0.12 | 0.05  | 0.0192 |
| E04-S | 3.36  | 0.98 | 0.88 | 0.63 | 0.58 | 0.18 | 0.08  | 0.0192 |
| E04-B | 2.16  | 0.55 | 0.49 | 0.36 | 0.34 | 0.11 | 0.04  | 0.0186 |

January 2016

|       |       |      |      |      |      |      |      |        |
|-------|-------|------|------|------|------|------|------|--------|
| M01-S | 12.61 | 4.34 | 3.98 | 2.86 | 2.64 | 1.00 | 0.57 | 0.0170 |
| M01-B | 13.13 | 4.49 | 4.11 | 2.96 | 2.72 | 1.02 | 0.59 | 0.0171 |

---

|       |       |      |      |      |      |      |       |        |
|-------|-------|------|------|------|------|------|-------|--------|
| M02-S | 10.83 | 3.64 | 3.33 | 2.40 | 2.20 | 0.81 | 0.46  | 0.0174 |
| M02-B | 12.24 | 4.18 | 3.82 | 2.77 | 2.56 | 0.97 | 0.57  | 0.0168 |
| M03-S | 6.66  | 2.17 | 1.95 | 1.40 | 1.30 | 0.42 | 0.23  | 0.0185 |
| M03-B | 6.22  | 1.98 | 1.80 | 1.31 | 1.20 | 0.39 | 0.21  | 0.0187 |
| M04-S | 5.59  | 1.77 | 1.61 | 1.15 | 1.07 | 0.36 | 0.20  | 0.0185 |
| M04-B | 4.97  | 1.56 | 1.41 | 1.01 | 0.93 | 0.31 | 0.17  | 0.0188 |
| M05-S | 4.40  | 1.38 | 1.25 | 0.88 | 0.81 | 0.29 | 0.17  | 0.0184 |
| M05-B | 4.94  | 1.47 | 1.32 | 0.93 | 0.85 | 0.28 | 0.15  | 0.0195 |
| M06-S | 3.65  | 1.26 | 1.15 | 0.89 | 0.83 | 0.40 | 0.29  | 0.0136 |
| M06-B | 3.80  | 1.09 | 0.98 | 0.69 | 0.62 | 0.20 | 0.09  | 0.0200 |
| M07-S | 3.24  | 0.84 | 0.77 | 0.51 | 0.46 | 0.11 | 0.02  | 0.0230 |
| M07-B | 3.04  | 0.83 | 0.75 | 0.52 | 0.48 | 0.15 | 0.08  | 0.0198 |
| M08-S | 3.07  | 0.85 | 0.77 | 0.52 | 0.48 | 0.12 | 0.05  | 0.0211 |
| M08-B | 3.25  | 0.91 | 0.82 | 0.56 | 0.51 | 0.14 | 0.07  | 0.0205 |
| M09-S | 2.19  | 0.54 | 0.47 | 0.32 | 0.29 | 0.05 | 0.01  | 0.0232 |
| M09-B | 2.46  | 0.62 | 0.56 | 0.39 | 0.36 | 0.11 | 0.06  | 0.0193 |
| M10-S | 1.63  | 0.32 | 0.29 | 0.19 | 0.18 | 0.05 | 0.01  | 0.0229 |
| M10-B | 1.88  | 0.36 | 0.33 | 0.20 | 0.19 | 0.01 | 0.003 | 0.0265 |
| W01-S | 6.52  | 2.21 | 2.03 | 1.45 | 1.33 | 0.55 | 0.36  | 0.0163 |
| W01-B | 4.08  | 1.36 | 1.24 | 0.90 | 0.83 | 0.32 | 0.19  | 0.0173 |
| W02-S | 4.18  | 1.28 | 1.16 | 0.82 | 0.74 | 0.26 | 0.14  | 0.0189 |
| W02-B | 4.25  | 1.36 | 1.24 | 0.89 | 0.82 | 0.32 | 0.19  | 0.0173 |
| W03-S | 4.54  | 1.34 | 1.20 | 0.83 | 0.75 | 0.26 | 0.14  | 0.0194 |
| W03-B | 4.30  | 1.27 | 1.14 | 0.80 | 0.72 | 0.24 | 0.13  | 0.0194 |
| W04-S | 2.73  | 0.75 | 0.68 | 0.47 | 0.42 | 0.09 | 0.03  | 0.0215 |
| W04-B | 2.91  | 0.78 | 0.71 | 0.51 | 0.48 | 0.15 | 0.08  | 0.0185 |
| E01-S | 5.29  | 1.59 | 1.43 | 1.02 | 0.94 | 0.30 | 0.17  | 0.0191 |
| E01-B | 6.16  | 1.84 | 1.67 | 1.19 | 1.10 | 0.36 | 0.19  | 0.0190 |
| E02-S | 3.28  | 0.81 | 0.74 | 0.52 | 0.46 | 0.17 | 0.09  | 0.0190 |
| E02-B | 2.54  | 0.51 | 0.45 | 0.26 | 0.23 | 0.04 | 0.005 | 0.0308 |
| E03-S | 2.16  | 0.49 | 0.47 | 0.29 | 0.25 | 0.03 | 0.01  | 0.0250 |
| E03-B | 2.48  | 0.66 | 0.61 | 0.43 | 0.40 | 0.13 | 0.07  | 0.0179 |
| E04-S | 1.69  | 0.35 | 0.31 | 0.22 | 0.20 | 0.05 | 0.02  | 0.0211 |
| E04-B | 1.68  | 0.35 | 0.33 | 0.23 | 0.21 | 0.05 | 0.02  | 0.0209 |

---

**Table S2.** Linear correlation coefficients of determination ( $R^2$ ) among the five PARAFAC components.

|    | C1    | C2    | C3    | C4    | C5    |
|----|-------|-------|-------|-------|-------|
| C1 | 1.000 |       |       |       |       |
| C2 | 0.781 | 1.000 |       |       |       |
| C3 | 0.843 | 0.981 | 1.000 |       |       |
| C4 | 0.750 | 0.987 | 0.958 | 1.000 |       |
| C5 | 0.994 | 0.821 | 0.873 | 0.790 | 1.000 |

**Table S3.** Percent decrease of each quantitative DOM variable per unit of salinity increase across the saltier zone calculated from the linear regression equations listed in Table 4. To be consistent for this calculation, the salinity range for the saltier zone was assume a fixed span from 1 to 33, though the real range could vary depending on variable and season (Figures 3 and 4). N/A: not applicable.

| Month | DOC | Percent decrease per unit of salinity increase |     |       |       |
|-------|-----|------------------------------------------------|-----|-------|-------|
|       |     | $a_{330}$                                      | C3  | C1+C5 | C2+C4 |
| Aug.  | 1.1 | 2.2                                            | 2.3 | 2.5   | 2.7   |
| Nov.  | N/A | 2.0                                            | 2.6 | 2.5   | 2.7   |
| Jan.  | 0.9 | 2.6                                            | 2.5 | 2.7   | 2.8   |

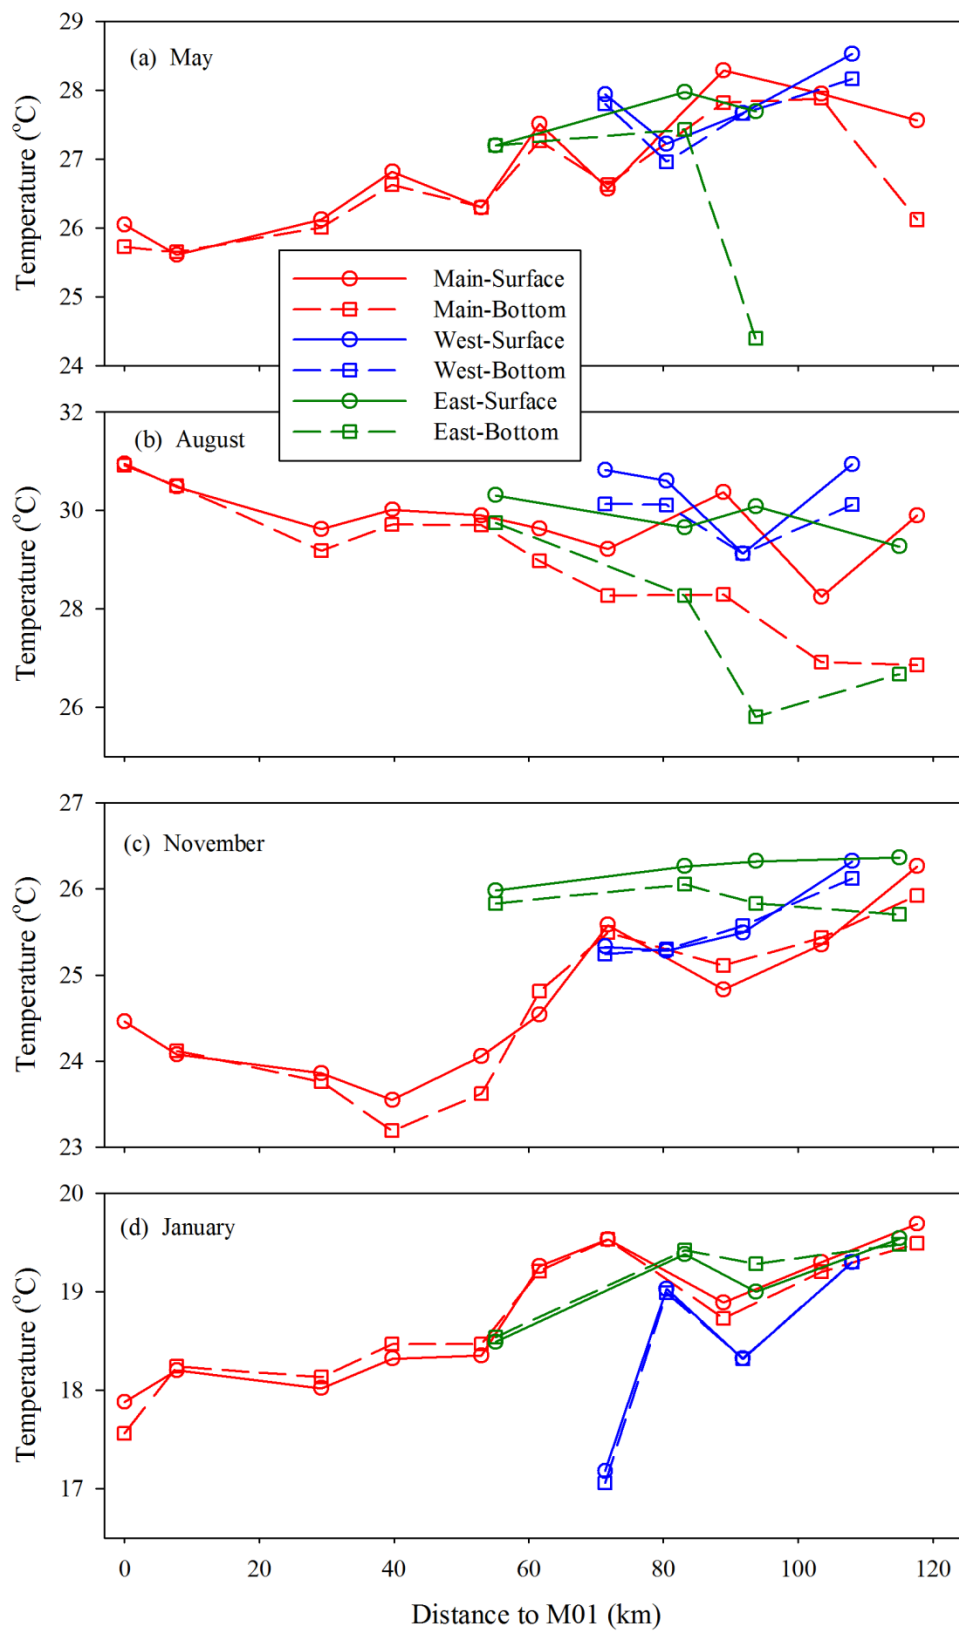

**Figure S1.** Water temperature versus distance to Sta. M01 along the main, west, and east transects in both surface and bottom waters.

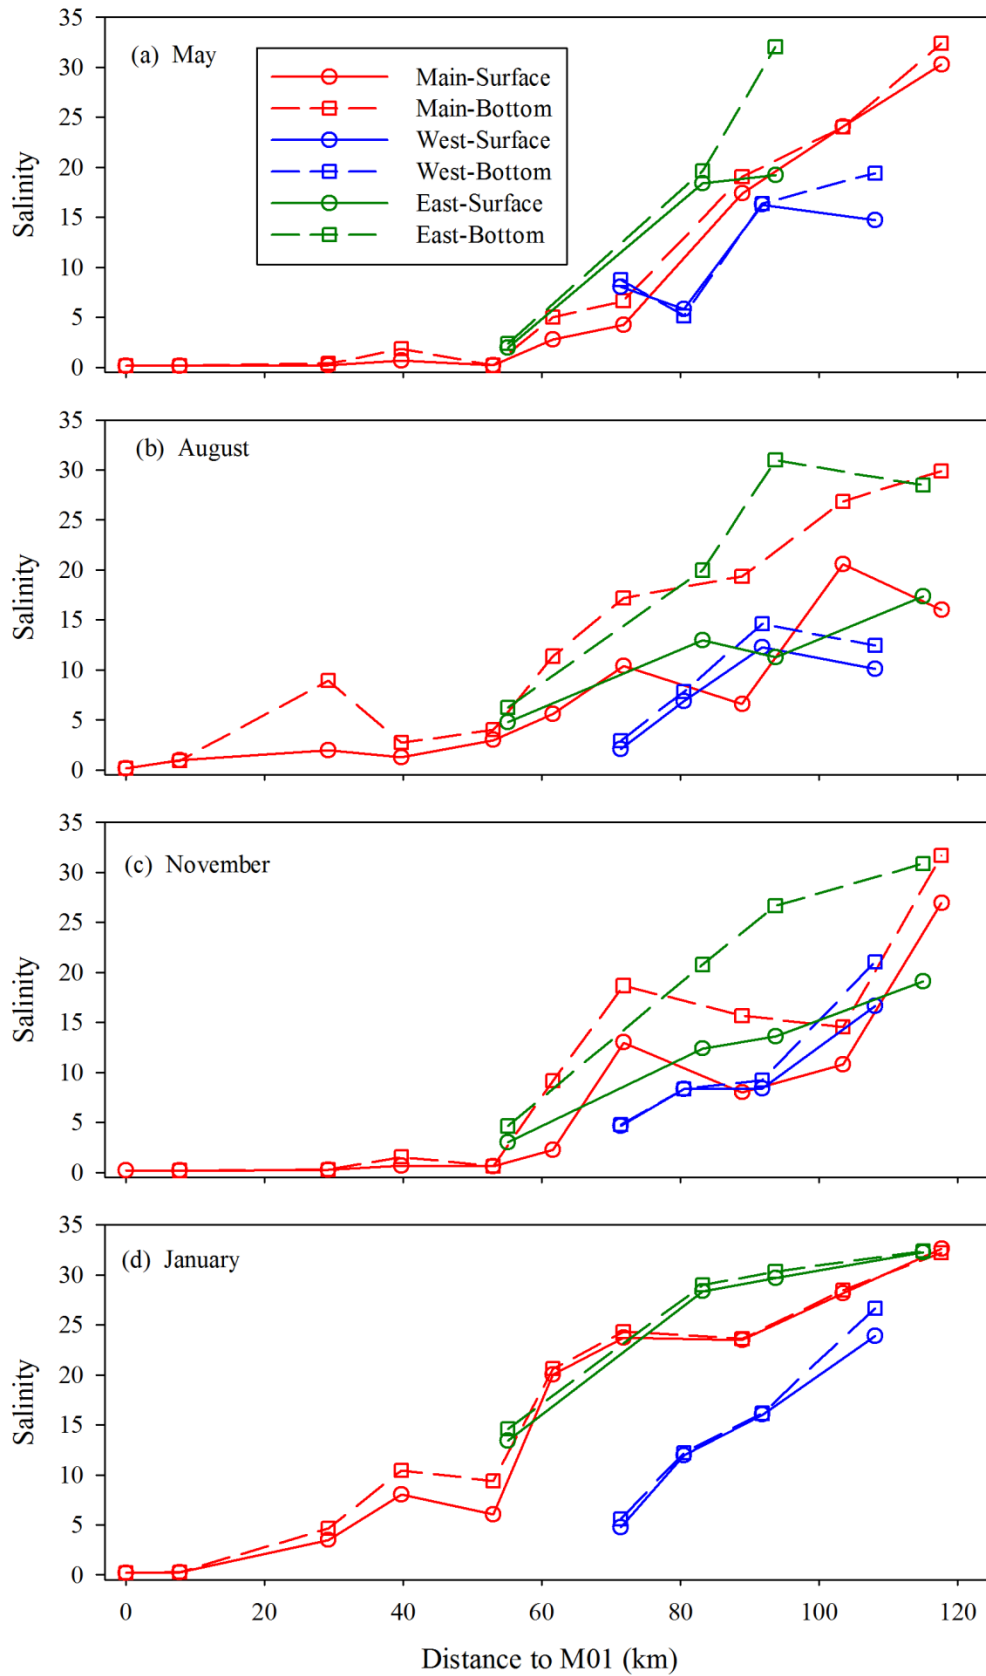

**Figure S2.** Salinity versus distance to Sta. M01 along the main, west, and east transects in both surface and bottom waters.

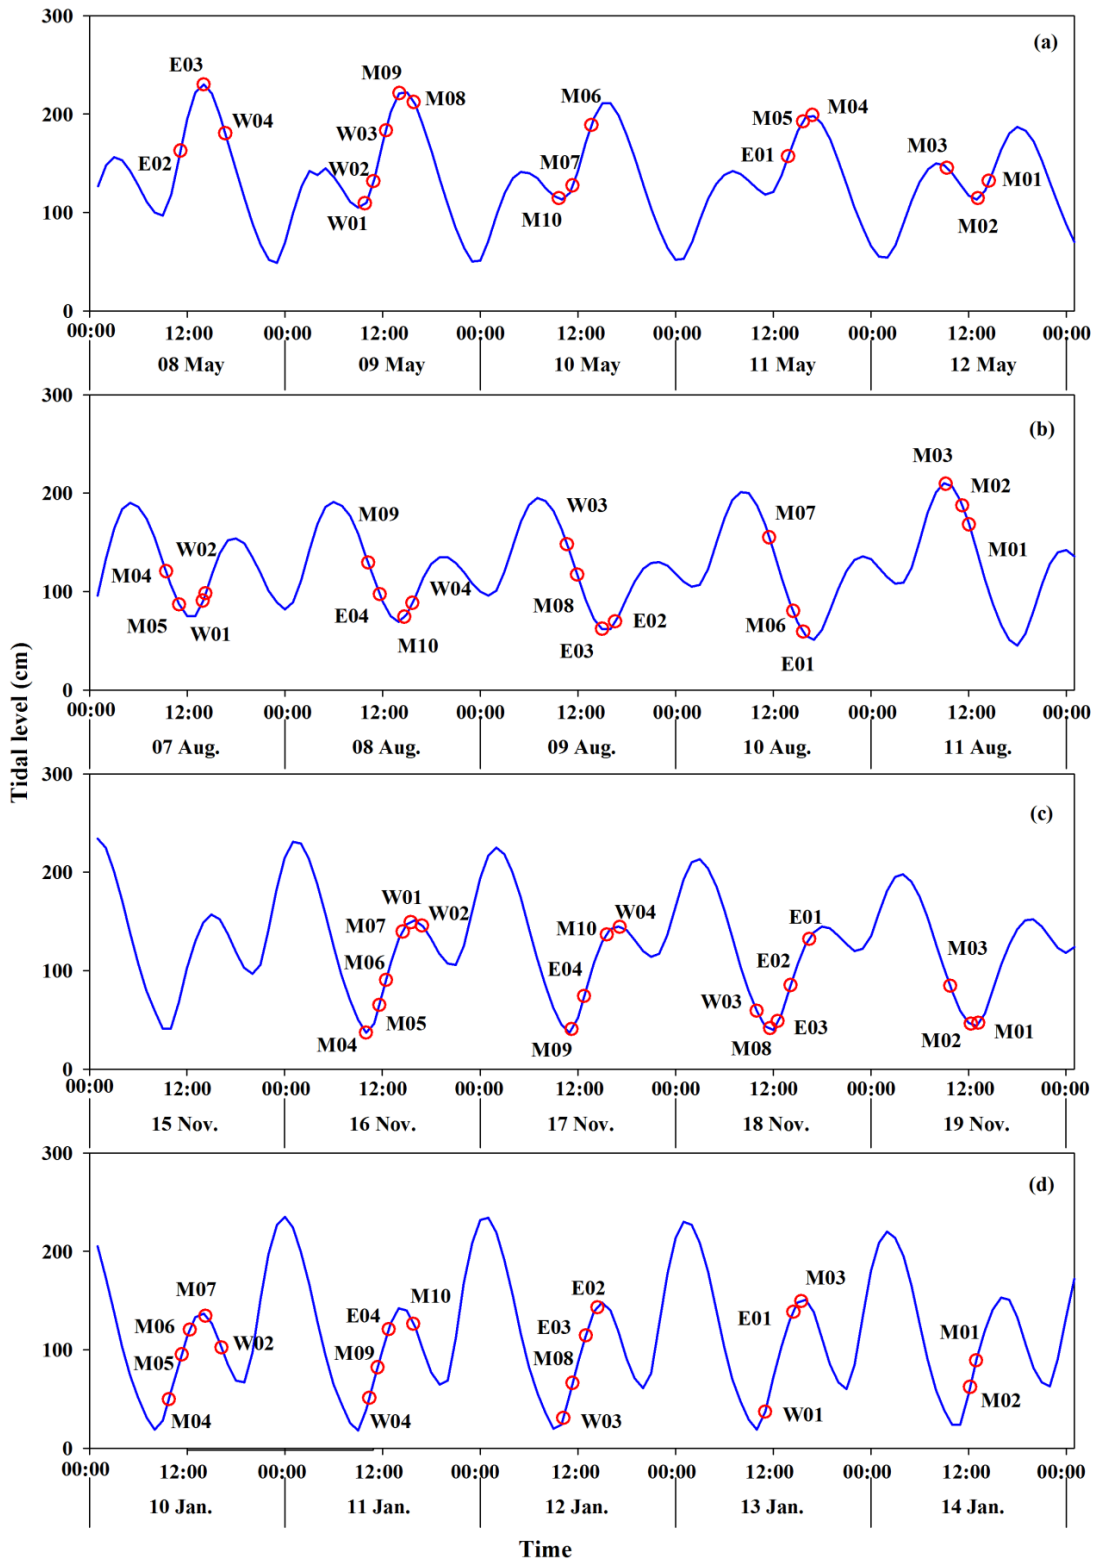

**Figure S3.** Tide charts overlaid with sampling stations for cruises in May (a), August (b), November (c), and January (d). Tides were recorded at Hengmen ( $22^{\circ}633\text{N}$ ,  $113^{\circ}517\text{E}$ ; Fig. 1) and provided by the National Marine Data and Information Service of China (<http://www.nmdis.org.cn/nmdisenglish/>). Tide heights at the sampling stations were approximate due to spatial variations of the tidal level.



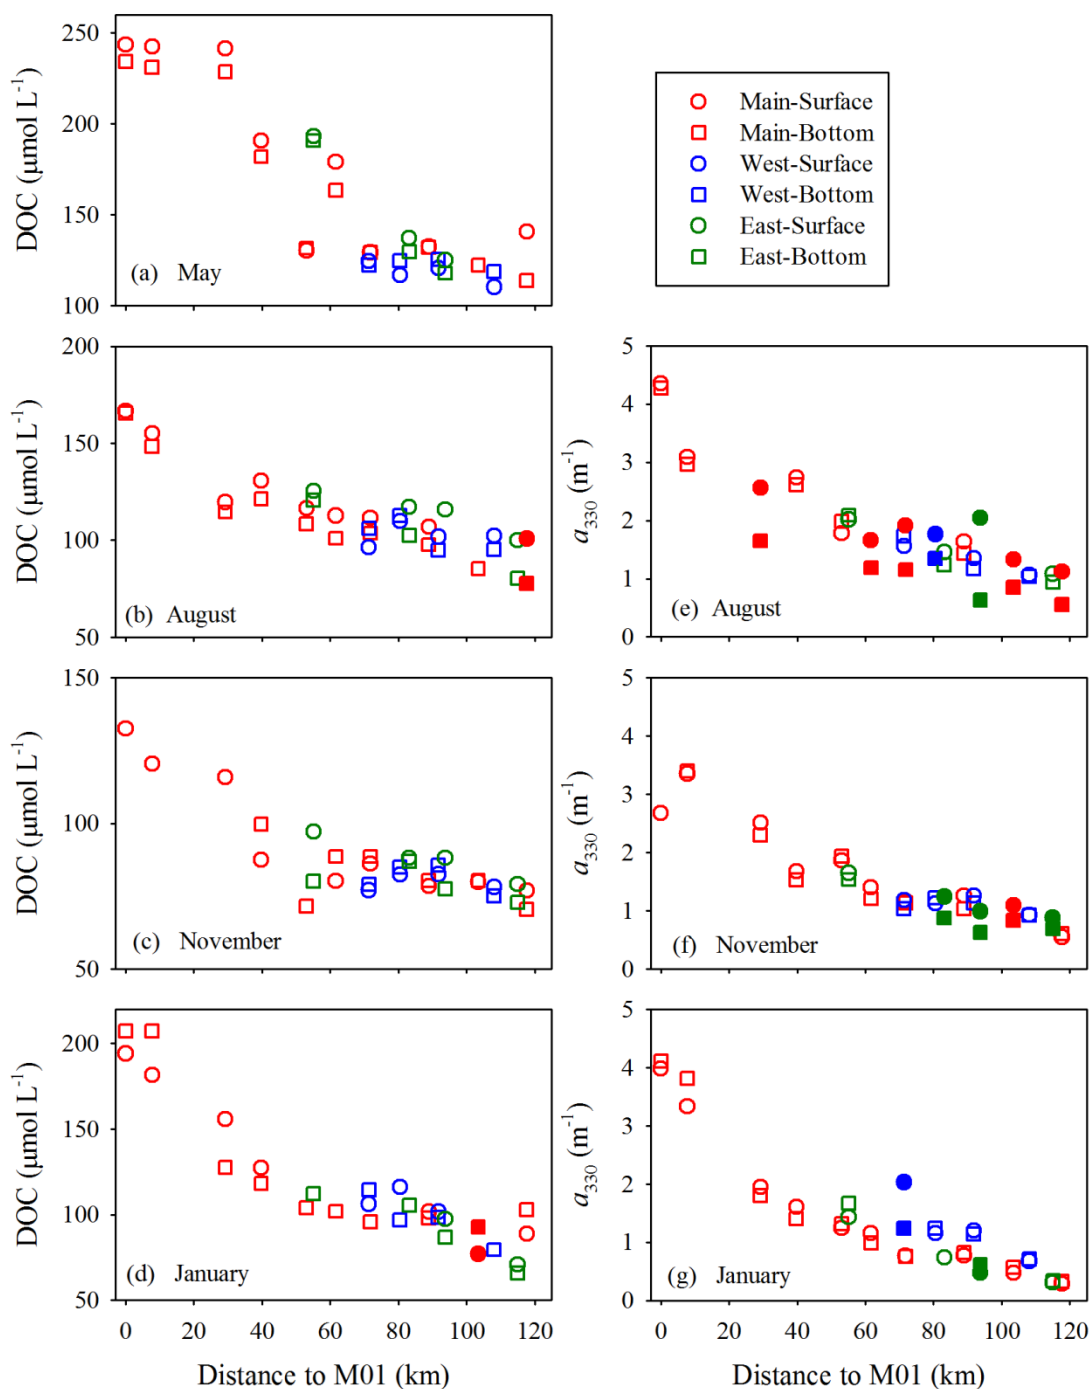

**Figure S4.** DOC concentration (a–d) and CDOM absorption coefficient at 330 nm (e–g) versus distance to station M01. Filled symbols denote stations with differences between bottom and surface >20% (DOC: M10 in August and M09 in January; CDOM: M03, M06, M07, M 09, M10, W02, and E03 in August, M09, E02, E03, and E04 in November, and W01, E02, and E03 in January). Legend: Main stands for main transect, West for west transect, and East for east transect.

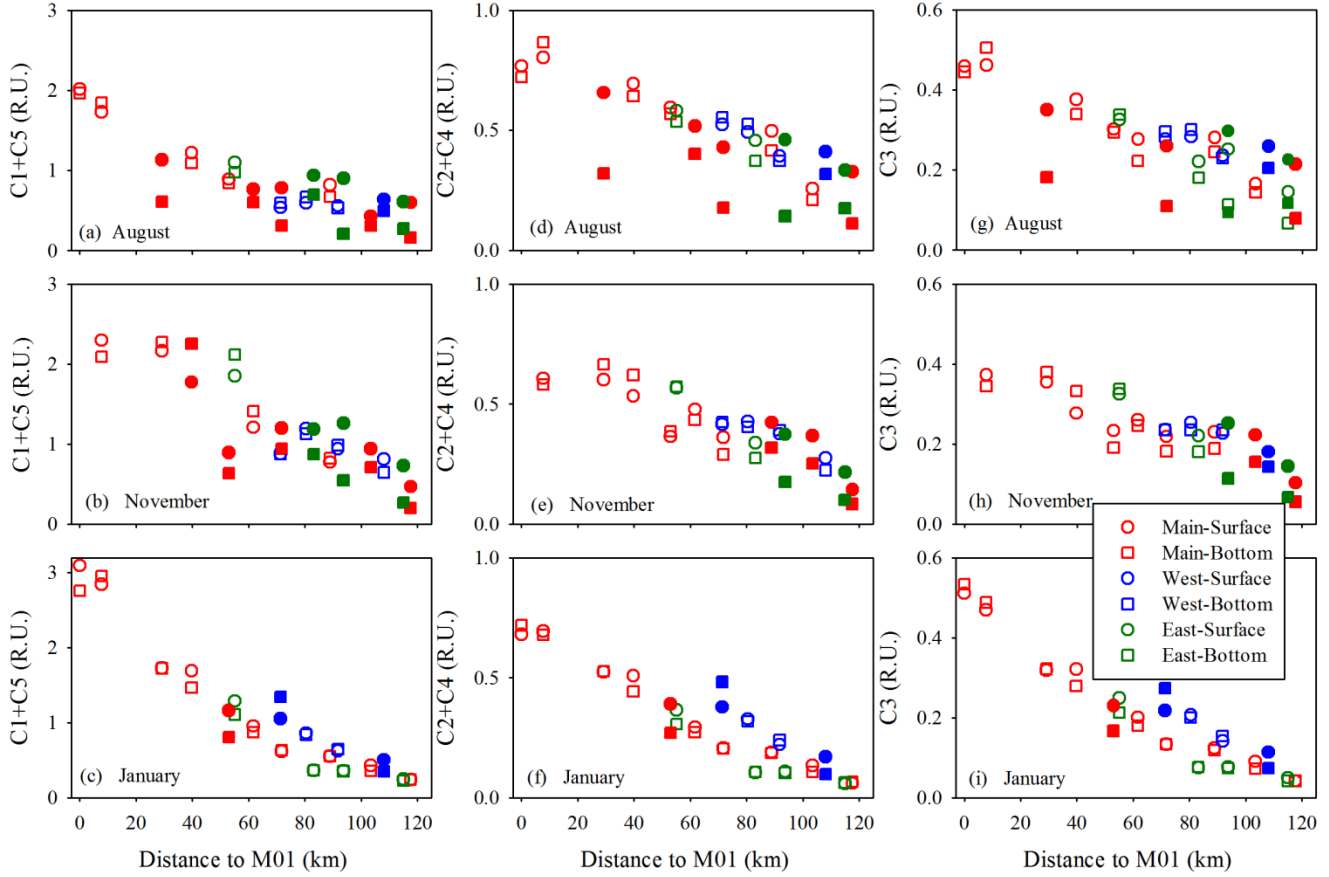

**Figure S5.** FDOM components, C1+C5 (a-c), C2+C4 (d-f) and C3 (g-i) versus distance to station M01. Filled symbols denote stations with differences between bottom and surface >20% (C1+C5: M03, M06, M07, M09, M10, W04, E02, E03, and E04 in August, M04, M05, M07, M09, M10, W04, E02, E03, and E04 in November, and M05, W01, and W04 in January; C2+C4: M03, M06, M07, M10, W04, E03, and E04 in August, M08, M09, M10, E03, and E04 in November, and M05, W01, and W04 in November; C3: M03, M07, M10, W04, E03, and E04 in August, M09, M10, W04, E03, and E04 in November, and M05, W01, and W04 in January).

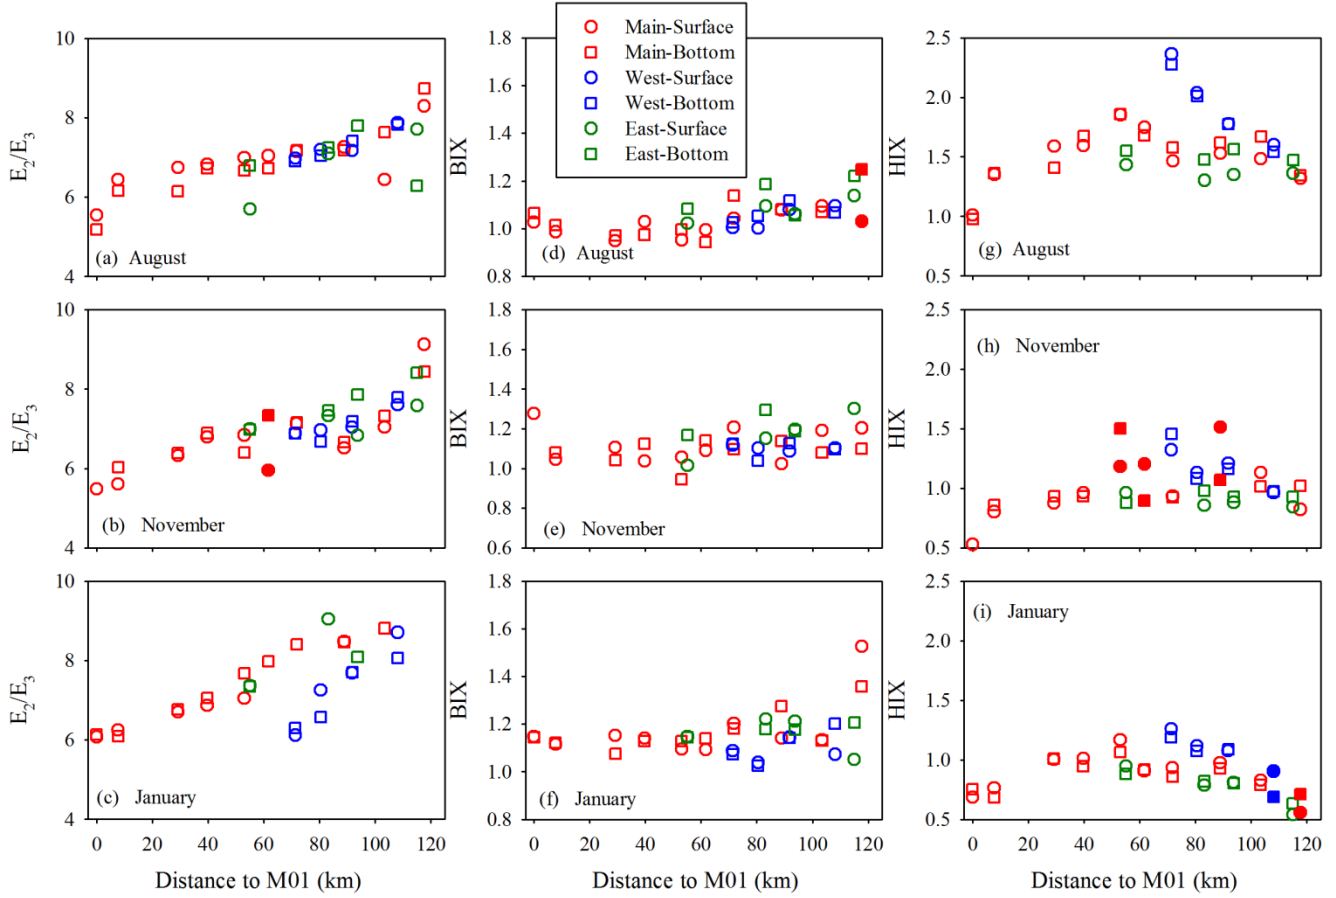

**Figure S6.**  $E_2/E_3$  (a-c), BIX (d-f) and HIX (g-i) versus distance to station M01. Filled symbols denote stations with differences between bottom and surface  $>20\%$  ( $E_2/E_3$ : M06 in November; BIX: M10 in August; HIX: M05, M06, M08, and M10 in November and M10, W04 in January).

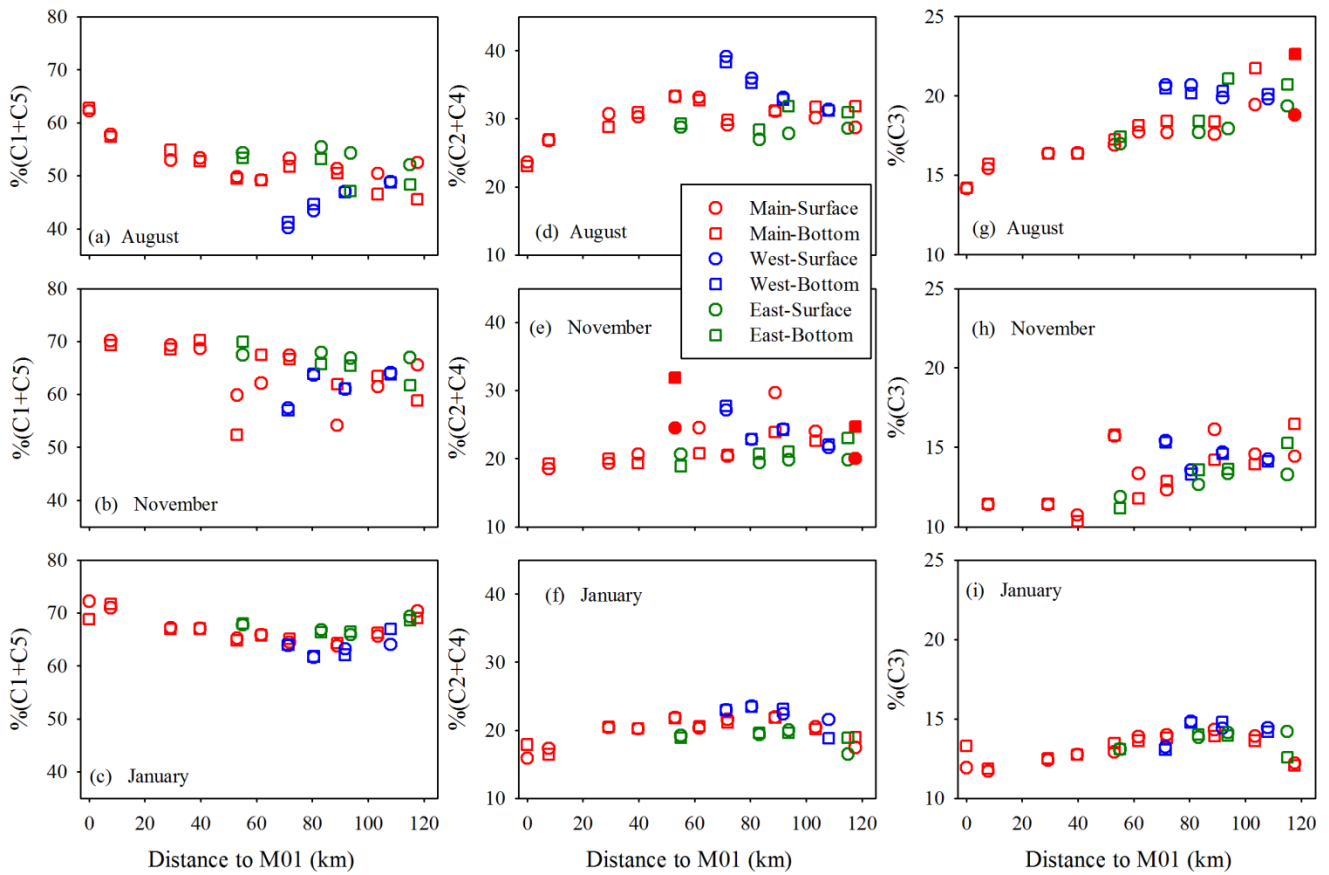

**Figure S7.** % (C1+C5) (a-c), % (C2+C4) (d-f), and %C3 (g-i) versus distance to Sta. M01 for each cruise. Filled symbols denote stations with differences between bottom and surface >20% (%(C2+C4): M05 and M10 in November; %C3: M10 in August).

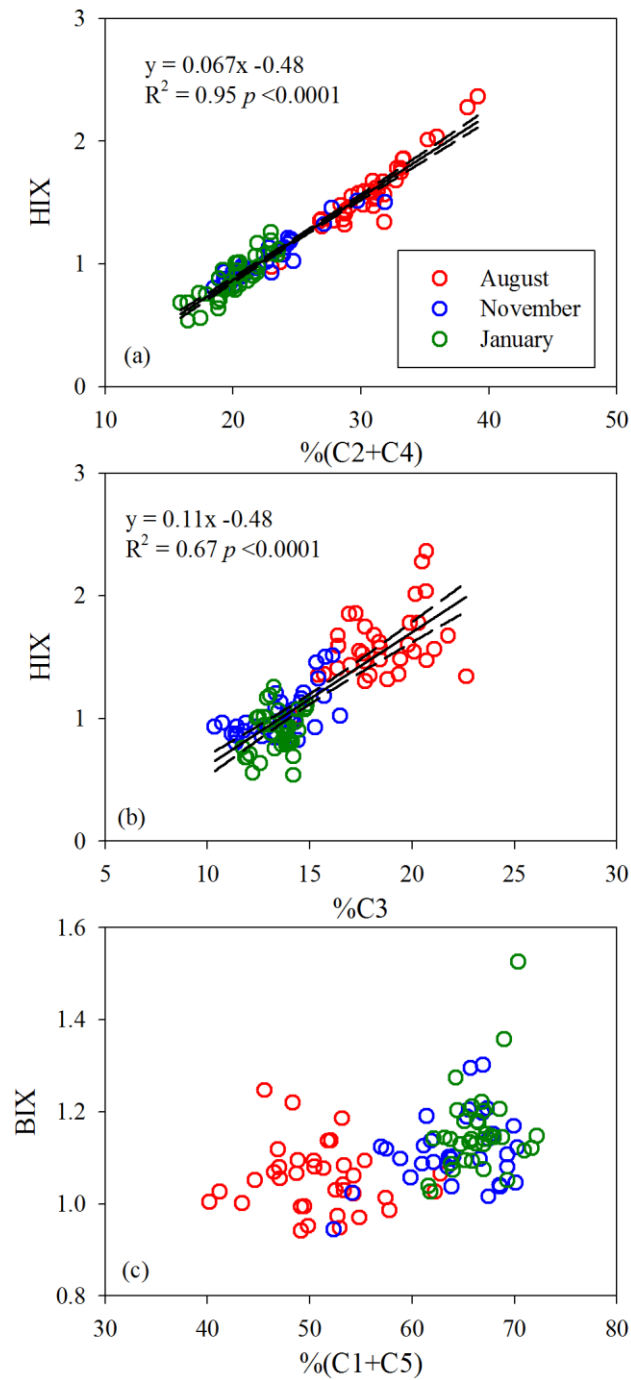

**Figure S8.** HIX vs.  $\%(C2+C4)$ (a), HIX vs.  $\%C3$  (b), and BIX vs.  $\%(C1+C5)$ (c). Solid lines in panels a and b denote linear fits of data for three cruises combined; dashed lines denote the 95% confidence intervals.

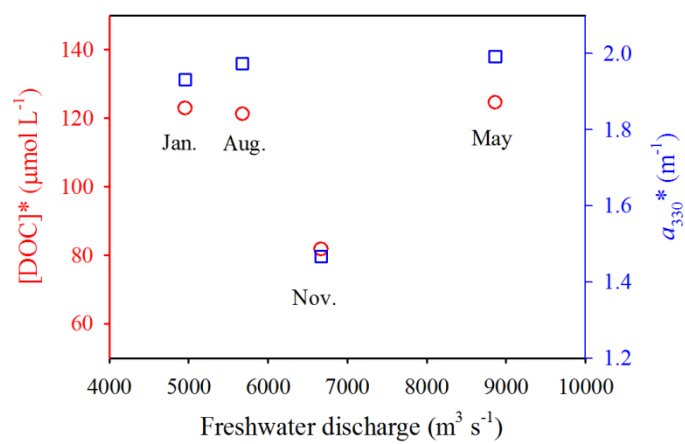

**Figure S9.** The effective [DOC] and  $a_{330}$  versus freshwater discharge rate in the Pearl River estuary.
